# Supplementary material for: Quantification of the impact of climate uncertainty on regional air quality
Source: Copernicus journal article supplement (doi:10.5194/acp-9-865-2009), 2009-02-03
Supplement: Supplementary file 1 [file acp-9-865-2009-supplement.pdf]

# 1 Supplementary Material

2 **Table S1.** Annual average zonal (longitude-average) temperatures and their difference  
3 from the IGSM outputs for percentiles of 0.5<sup>th</sup>, 5<sup>th</sup>, 50<sup>th</sup>, 95<sup>th</sup> and 99.5<sup>th</sup> for five latitudes  
4 in 2050.

| 2050 Average Zonal Temperature (K) |          |       |       |       |       |       |
|------------------------------------|----------|-------|-------|-------|-------|-------|
| Latitude Index                     | Latitude | 0.5%  | 5%    | 50%   | 95%   | 99.5% |
| 1                                  | 19.6     | 295.3 | 295.3 | 295.9 | 296.6 | 297.5 |
| 2                                  | 27.4     | 292.0 | 291.9 | 292.8 | 293.1 | 294.1 |
| 3                                  | 35.2     | 288.2 | 288.4 | 288.6 | 290.0 | 291.1 |
| 4                                  | 43.0     | 282.4 | 282.8 | 283.3 | 284.2 | 285.4 |
| 5                                  | 50.9     | 277.3 | 277.8 | 278.2 | 279.1 | 279.8 |

  

| 2050 Average $\Delta T$ (K) |          |          |        |   |         |           |
|-----------------------------|----------|----------|--------|---|---------|-----------|
| Latitude Index              | Latitude | 0.5%-50% | 5%-50% | - | 95%-50% | 99.5%-50% |
| 1                           | 19.6     | -0.6     | -0.6   | - | 0.7     | 1.6       |
| 2                           | 27.4     | -0.8     | -0.9   | - | 0.3     | 1.3       |
| 3                           | 35.2     | -0.4     | -0.2   | - | 1.4     | 2.5       |
| 4                           | 43.0     | -0.9     | -0.5   | - | 0.9     | 2.1       |
| 5                           | 50.9     | -0.9     | -0.4   | - | 0.9     | 1.6       |

5

6

7

8

9

**Table S2.** Annualized and summer-averaged emissions of NO<sub>x</sub>, SO<sub>2</sub>, NH<sub>3</sub>, PM<sub>2.5</sub>, biogenic VOC (BVOC) and anthropogenic VOC (AVOC) (tons/day) for 2001 and the base, low-extreme and high-extreme scenarios in 2050

|                  | Annualized (tons/day) |       |             |              |       | Summer average (tons/day) |             |              |        |        |             |              |        |
|------------------|-----------------------|-------|-------------|--------------|-------|---------------------------|-------------|--------------|--------|--------|-------------|--------------|--------|
|                  | 2001                  | Base  | Low-extreme | High-extreme | 2001  | Base                      | Low-extreme | High-extreme | 2001   | Base   | Low-extreme | High-extreme |        |
|                  |                       |       |             |              |       |                           |             |              |        |        |             |              |        |
| <b>West</b>      | NO <sub>x</sub>       | 6460  | 3343        | 3321         | 3370  | 6938                      | 3915        | 3869         | 3934   | 6938   | 3915        | 3869         | 3934   |
|                  | SO <sub>2</sub>       | 1387  | 827         | 827          | 827   | 1472                      | 1010        | 1010         | 1010   | 1472   | 1010        | 1010         | 1010   |
|                  | NH <sub>3</sub>       | 1460  | 1981        | 1981         | 1981  | 1698                      | 2236        | 2236         | 2236   | 1698   | 2236        | 2236         | 2236   |
|                  | PM <sub>2.5</sub>     | 2183  | 2114        | 2114         | 2114  | 3484                      | 3480        | 3480         | 3480   | 3484   | 3480        | 3480         | 3480   |
|                  | BVOC                  | 14064 | 15884       | 14740        | 19180 | 32745                     | 35443       | 33097        | 42695  | 32745  | 35443       | 33097        | 42695  |
| AVOC             | 5774                  | 4224  | 4159        | 4228         | 6328  | 4761                      | 4774        | 4774         | 6328   | 4761   | 4774        | 4774         |        |
| <b>Plain</b>     | NO <sub>x</sub>       | 12038 | 7232        | 7175         | 7430  | 13390                     | 8722        | 8682         | 8996   | 13390  | 8722        | 8682         | 8996   |
|                  | SO <sub>2</sub>       | 5915  | 3846        | 3846         | 3846  | 6317                      | 4506        | 4506         | 4506   | 6317   | 4506        | 4506         | 4506   |
|                  | NH <sub>3</sub>       | 2806  | 3483        | 3483         | 3483  | 3274                      | 4161        | 4161         | 4161   | 3274   | 4161        | 4161         | 4161   |
|                  | PM <sub>2.5</sub>     | 3346  | 3215        | 3215         | 3215  | 3678                      | 3633        | 3633         | 3633   | 3678   | 3633        | 3633         | 3633   |
|                  | BVOC                  | 16329 | 15433       | 14204        | 18963 | 35068                     | 36707       | 34047        | 44913  | 35068  | 36707       | 34047        | 44913  |
| AVOC             | 6551                  | 4567  | 4509        | 4580         | 6653  | 4891                      | 4885        | 4925         | 6653   | 4891   | 4885        | 4925         |        |
| <b>Midwest</b>   | NO <sub>x</sub>       | 15480 | 6073        | 6050         | 6159  | 15507                     | 6386        | 6377         | 6537   | 15507  | 6386        | 6377         | 6537   |
|                  | SO <sub>2</sub>       | 15600 | 8060        | 8060         | 8060  | 15500                     | 8572        | 8572         | 8572   | 15500  | 8572        | 8572         | 8572   |
|                  | NH <sub>3</sub>       | 2933  | 3376        | 3376         | 3376  | 3257                      | 3874        | 3874         | 3874   | 3257   | 3874        | 3874         | 3874   |
|                  | PM <sub>2.5</sub>     | 3420  | 2945        | 2945         | 2945  | 3012                      | 2713        | 2713         | 2713   | 3012   | 2713        | 2713         | 2713   |
|                  | BVOC                  | 11165 | 9687        | 8824         | 11885 | 27491                     | 26862       | 24528        | 33141  | 27491  | 26862       | 24528        | 33141  |
| AVOC             | 9984                  | 6412  | 6353        | 6416         | 9492  | 6433                      | 6430        | 6442         | 9492   | 6433   | 6430        | 6442         |        |
| <b>Northeast</b> | NO <sub>x</sub>       | 8052  | 2986        | 2985         | 2984  | 7544                      | 2772        | 2765         | 2775   | 7544   | 2772        | 2765         | 2775   |
|                  | SO <sub>2</sub>       | 7594  | 2030        | 2030         | 2030  | 7093                      | 1814        | 1814         | 1814   | 7093   | 1814        | 1814         | 1814   |
|                  | NH <sub>3</sub>       | 888   | 1005        | 1005         | 1005  | 1018                      | 1178        | 1178         | 1178   | 1018   | 1178        | 1178         | 1178   |
|                  | PM <sub>2.5</sub>     | 1450  | 1039        | 1039         | 1039  | 1098                      | 846         | 846          | 846    | 1098   | 846         | 846          | 846    |
|                  | BVOC                  | 3694  | 4406        | 4055         | 5305  | 9219                      | 11751       | 10807        | 14323  | 9219   | 11751       | 10807        | 14323  |
| AVOC             | 6510                  | 3905  | 3866        | 3908         | 5899  | 3730                      | 3732        | 3700         | 5899   | 3730   | 3732        | 3700         |        |
| <b>Southeast</b> | NO <sub>x</sub>       | 13513 | 5592        | 5568         | 5611  | 13463                     | 5788        | 5756         | 5806   | 13463  | 5788        | 5756         | 5806   |
|                  | SO <sub>2</sub>       | 11052 | 4364        | 4364         | 4364  | 11010                     | 4836        | 4836         | 4836   | 11010  | 4836        | 4836         | 4836   |
|                  | NH <sub>3</sub>       | 2068  | 2754        | 2754         | 2754  | 2646                      | 3563        | 3563         | 3563   | 2646   | 3563        | 3563         | 3563   |
|                  | PM <sub>2.5</sub>     | 2969  | 2698        | 2698         | 2698  | 2556                      | 2396        | 2396         | 2396   | 2556   | 2396        | 2396         | 2396   |
|                  | BVOC                  | 27092 | 24780       | 22830        | 29566 | 54672                     | 60992       | 56542        | 71647  | 54672  | 60992       | 56542        | 71647  |
| AVOC             | 10121                 | 6320  | 6242        | 6338         | 9254  | 5931                      | 5947        | 5851         | 9254   | 5931   | 5947        | 5851         |        |
| <b>US</b>        | NO <sub>x</sub>       | 55544 | 25225       | 25099        | 25553 | 56841                     | 27583       | 27450        | 28048  | 56841  | 27583       | 27450        | 28048  |
|                  | SO <sub>2</sub>       | 41548 | 19127       | 19127        | 19127 | 41391                     | 20738       | 20738        | 20738  | 41391  | 20738       | 20738        | 20738  |
|                  | NH <sub>3</sub>       | 10155 | 12598       | 12598        | 12598 | 11894                     | 15013       | 15013        | 15013  | 11894  | 15013       | 15013        | 15013  |
|                  | PM <sub>2.5</sub>     | 13368 | 12010       | 12010        | 12010 | 13828                     | 13067       | 13067        | 13067  | 13828  | 13067       | 13067        | 13067  |
|                  | BVOC                  | 72344 | 70190       | 64652        | 84898 | 159196                    | 171755      | 159020       | 206719 | 159196 | 171755      | 159020       | 206719 |
| AVOC             | 38938                 | 25428 | 25123       | 25470        | 37626 | 25750                     | 25755       | 25693        | 37626  | 25750  | 25755       | 25693        |        |

1

2

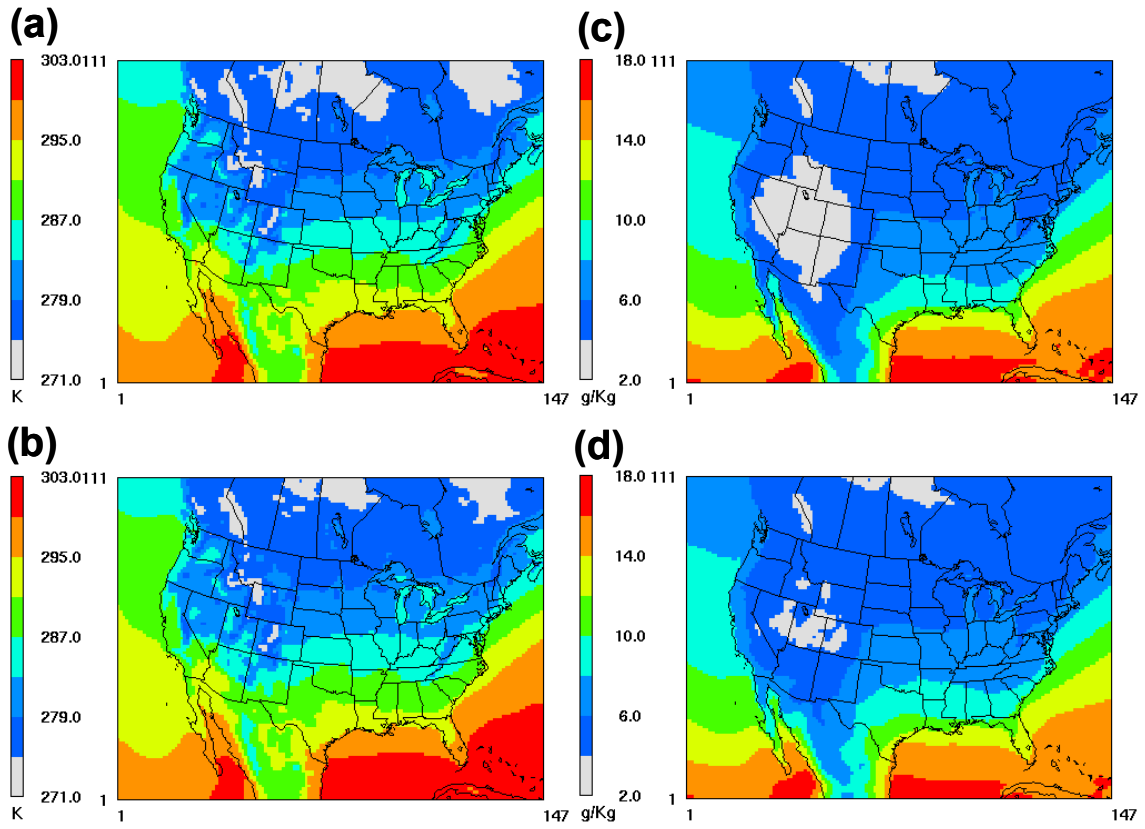

3

4 Fig. S1. Spatial distribution of annualized temperature (K) (figures (a) & (b)) and  
5 absolute humidity (g/Kg) (figures (c) & (d)) for 2050 base GISS-MM5 (top) and 50%  
6 IGSM climate (bottom)

7
